# Supplementary material
Source: PubMed Central journal article supplement (PMC5470366)

## Supplementary Online Content

Musso G, Cassader M, Paschetta E, Gambino R. Thiazolidinediones and advanced liver fibrosis in nonalcoholic steatohepatitis: a meta-analysis. *JAMA Intern Med*. Published online February 27, 2017.  
doi:10.1001/jamainternmed.2016.9607

**eMethods.** Supplemental Methods

**eFigure 1.** Funnel Plot of Comparison: 2 TZD and Improvement in Advanced (F3-4) Fibrosis

**eFigure 2.** Body Weight Changes (% Initial Body Weight) in RCTs

This supplementary material has been provided by the authors to give readers additional information about their work.

## **eMethods.** Supplemental Methods

### **Data Sources and Searches**

Example of an online strategy run in PUBMED:

1. liver.tw.
2. (non-alcoholic or non alcoholic or nonalcoholic).tw.
3. (fatty or steato\*).tw.
4. (NAFLD or NAFLD or NASH or fibrosis).tw.
5. 1 and 2 and 3
6. 4 or 5
7. (insulin sensit\* or pioglitazone or rosiglitazone or thiazolidinedione\* or  
glitazone\* or PPAR- $\gamma$  agonist).tw.
8. 6 and 7.

**eFigure 1.** Funnel Plot of Comparison: 2 TZD and Improvement in Advanced (F3-4) Fibrosis

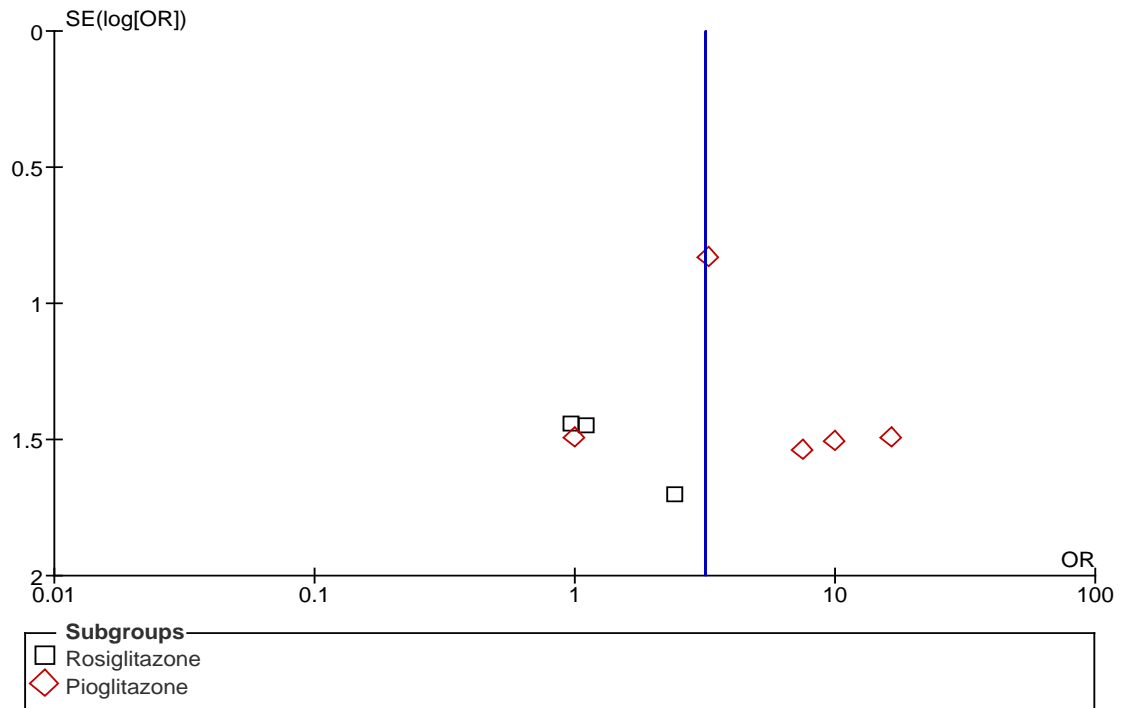

**eFigure 2.** Body Weight Changes (% Initial Body Weight) in RCTs

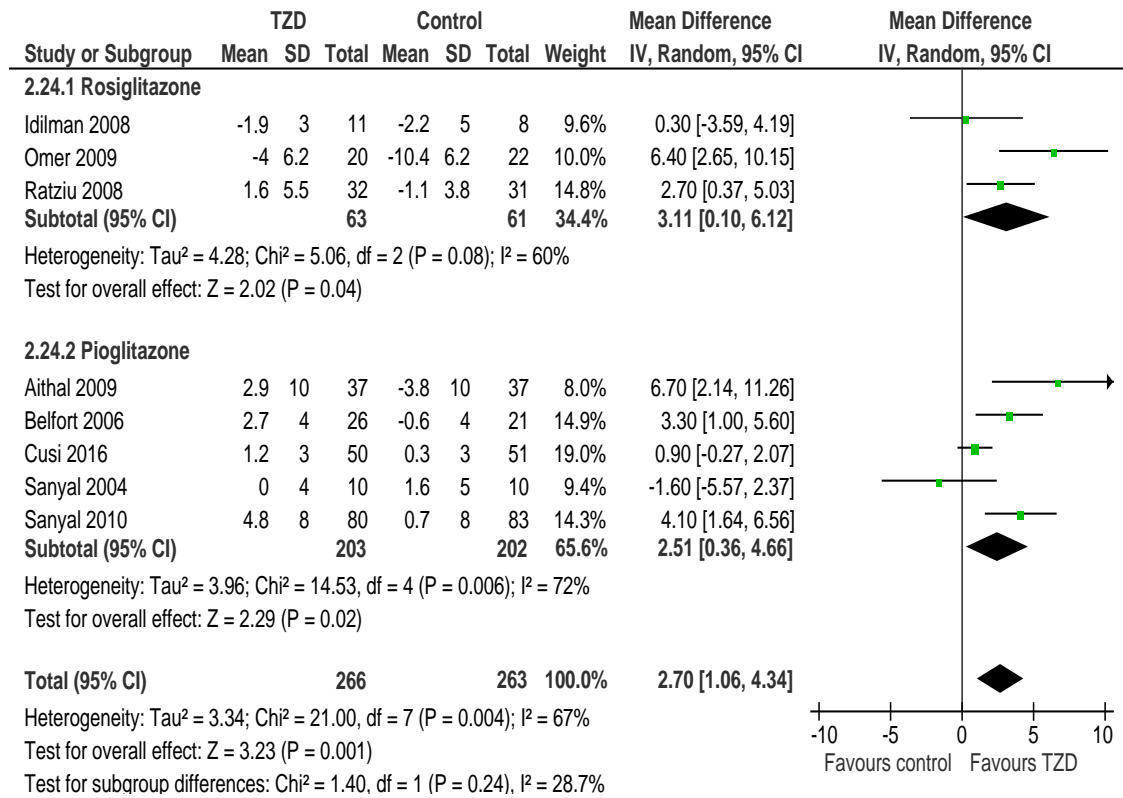

Supplement: jamainternmed-177-633-s001.pdf [file jamainternmed-177-633-s001.pdf]
